## CORRESPONDENCE

the understanding that the risk-benefit ratio of continuous caudal infusions and the proposed added protection of the caudal barrier flap merit further investigation.

**Brenda C. McClain, M.D.**

Assistant Professor of Anesthesiology and Pediatrics

**Shirley A. Redd, M.D.**

Assistant Professor of Anesthesiology

Department of Anesthesiology  
The Medical College of Georgia  
1520 15th Street  
Augusta, Georgia 30912-2700

Anesthesiology  
79:401, 1993

© 1993 American Society of Anesthesiologists, Inc.  
J. B. Lippincott Company, Philadelphia

## Succinylcholine and Duchenne Muscular Dystrophy

*To the Editor:*—A letter to the editor<sup>1</sup> describes intractable cardiac arrest following succinylcholine in patients with Duchenne muscular dystrophy (DMD). I know of two other cases of cardiac arrest following succinylcholine; one of the patients survived. The patient who survived was found to have DMD. Unfortunately, in the patient who did not survive, the pathologist did not follow the suggestion of the anesthesiologist to do a muscle biopsy for DMD.

The letter<sup>1</sup> suggests glucose and insulin for the immediate treatment of hyperkalemia. However, I think that, in a patient in whom cardiac arrest occurred, the ischemia plus glucose might result in more damage to the central nervous system.<sup>2,3</sup> Therefore, I suggest that, in a patient with unstable circulation who is severely hypotensive, the initial pharmacologic treatment should be epinephrine, because it is well known that epinephrine is first-line treatment for hyperkalemia and has beneficial effects on circulation. Calcium and bicarbonate also are indicated for the immediate therapy of hyperkalemia. After the circulation has stabilized, the administration of glucose and insulin should be considered.

\* Lundy EF, Kuhn JE, Kwon JM, Zelenock GB, D'Alecy LG: Infusion of five percent dextrose increases mortality and morbidity following six minutes of cardiac arrest in resuscitated dogs. *Journal of Critical Care* 2:4-14, 1987.

† Steward DJ: Hyperglycaemia: something else to worry about! *Paediatric Anaesthesia* 2:81-83, 1992.

## References

1. Dalens BP: Caudal anesthesia, *Pediatric Regional Anesthesia*. Edited by Dalens BP. Boca Raton, CRC Press, 1990, p 372
2. Abouleish E, Orig T, Amortegui, AJ: Bacteriologic comparison between epidural and caudal techniques. *ANESTHESIOLOGY* 53:511-514, 1980
3. Strong WE: Epidural abscess associated with epidural catheterization: A rare event? Report of two cases with markedly delayed presentation. *ANESTHESIOLOGY* 74:943-946, 1991
4. Mamourian AC, Dickman CA, Drayer BP, Sonntag VKH: Spinal epidural abscess: The cases following spinal epidural injection demonstrated with magnetic resonance imaging. *ANESTHESIOLOGY* 78:204-207, 1993
5. Baker AS, Ojemann RG, Swartz MN, Richardson EP: Spinal epidural abscess. *N Engl J Med* 293:463-468, 1975

(Accepted for publication April 25, 1993.)

It has been my practice to give a nondepolarizing muscle relaxant before succinylcholine in all children aged 1 yr and older. It is known that pretreatment in children prevents an increase in creatine phosphokinase and fasciculations<sup>3</sup> and reduces myalgia. Though potassium levels were not measured in this study of normal infants and children,<sup>1</sup> such measurements may reduce hyperkalemia, which follows in patients with unsuspected DMD.

**Frederic A. Berry, M.D.**

Professor of Anesthesiology and Pediatrics

Department of Anesthesiology

University of Virginia Health Sciences Center, Box 238  
Charlottesville, Virginia 22908

## References

1. Rosenberg H, Gronert GA: Intractable cardiac arrest in children given succinylcholine (letter). *ANESTHESIOLOGY* 77:1054, 1992
2. Nakakimura K, Fleischer JE, Drummond JC, Scheller MS, Zornow MH, Grafe MR, Shapiro HM: Glucose administration before cardiac arrest worsens neurologic outcome in cats. *ANESTHESIOLOGY* 72:1005-1011, 1990
3. Cozantitis DA, Erkola O, Klemola U-M, Makela V: Precurarisation in infants and children less than three years of age. *Can J Anaesth* 34:17-20, 1987

(Accepted for publication April 25, 1993.)
